# Supplementary material
Source: MDPI journal article supplement (https://www.mdpi.com/2073-4441/12/1/289)
Supplement: s1 [file s1]

Article

Effects of Water Stress on Fluorescence Parameters and Photosynthetic Characteristics of Drip Irrigation in Rice

Qiang Xu 1,3, Tingbo Lv 1,3,*, Xiaopeng Ma 2,4,*, Meng Bai 1,3, Zelin Wang 1,3 and Jingran Niu 1,3


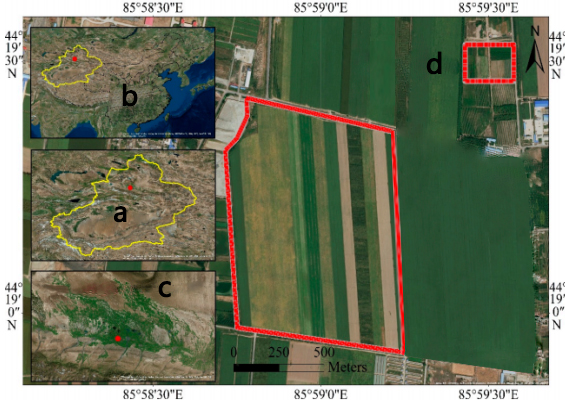


**Figure S1.** The experiment took place in (**a**) China, in (**b**) Xinjiang in (**c**) the oasis agroecosystem at (**d**) the Erlian Key Laboratory of Modern Water Saving Irrigation Corps.

**Figure S2.** Average daily temperature and rainfall of rice in the growth period of the Shihezi region in (**a**) and(**b**).
